# Supplementary material for: The unconventional activation of the muscarinic acetylcholine receptor M4R by diverse ligands
Source: PubMed Central journal article supplement (PMC9126879; doi:10.1038/s41467-022-30595-y), 2022-05-23
Supplement: 41467_2022_30595_MOESM1_ESM.pdf [file 41467_2022_30595_MOESM1_ESM.pdf]

## Supplementary information

### Supplemental Figures

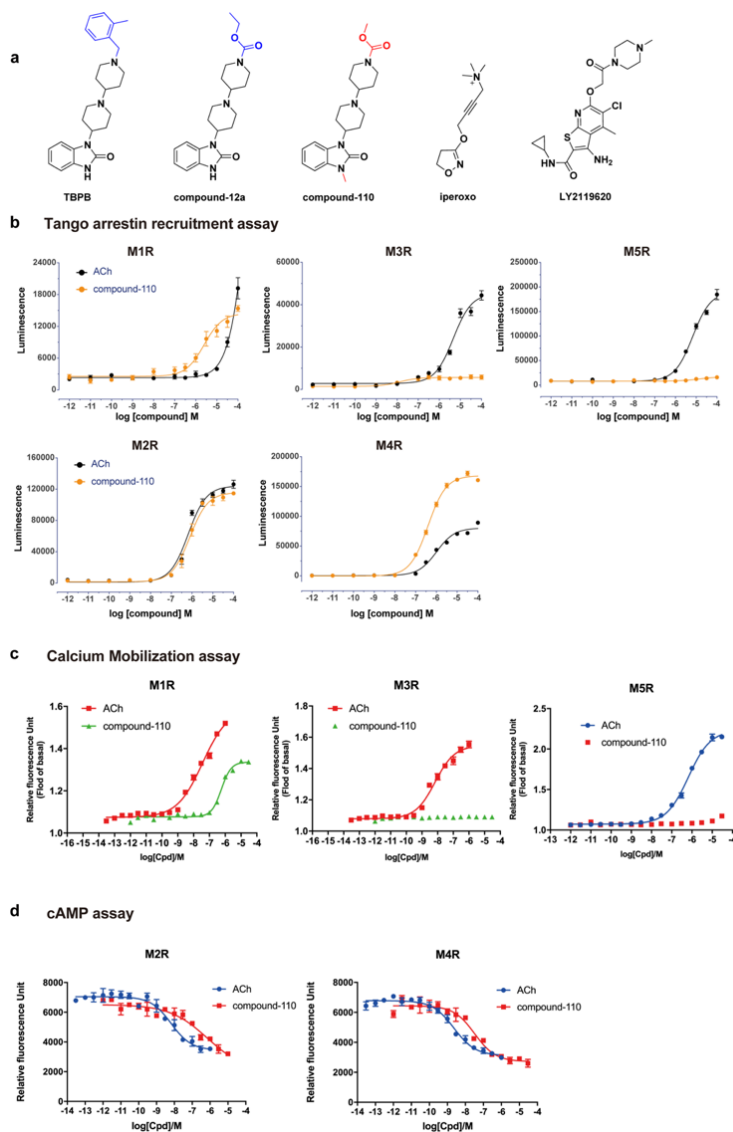

**Supplementary Figure 1. The characterization of compound-110's selectivity within muscarinic receptors (M1R-M5R).** **a)** The chemical structures of TBPB, compound-12a, compound-110, iperoxo and LY2119620. **b)** The tango assays for compound-110 within muscarinic receptors (M1R-M5R), data are represented as mean  $\pm$  SEM from two independent assays with two technical replicates. **c)** The calcium mobilization assay in  $G_q$  signal pathway for compound-110 among M1R, M3R, and M5R, data are represented as mean  $\pm$  SEM from one independent assay with three technical replicates. **d)** The cAMP assay in  $G_i$  signal pathway for compound-110 between M2R and M4R, data are represented as mean  $\pm$  SEM from one independent assay with three technical replicates. Source data are provided as a Source Data file.

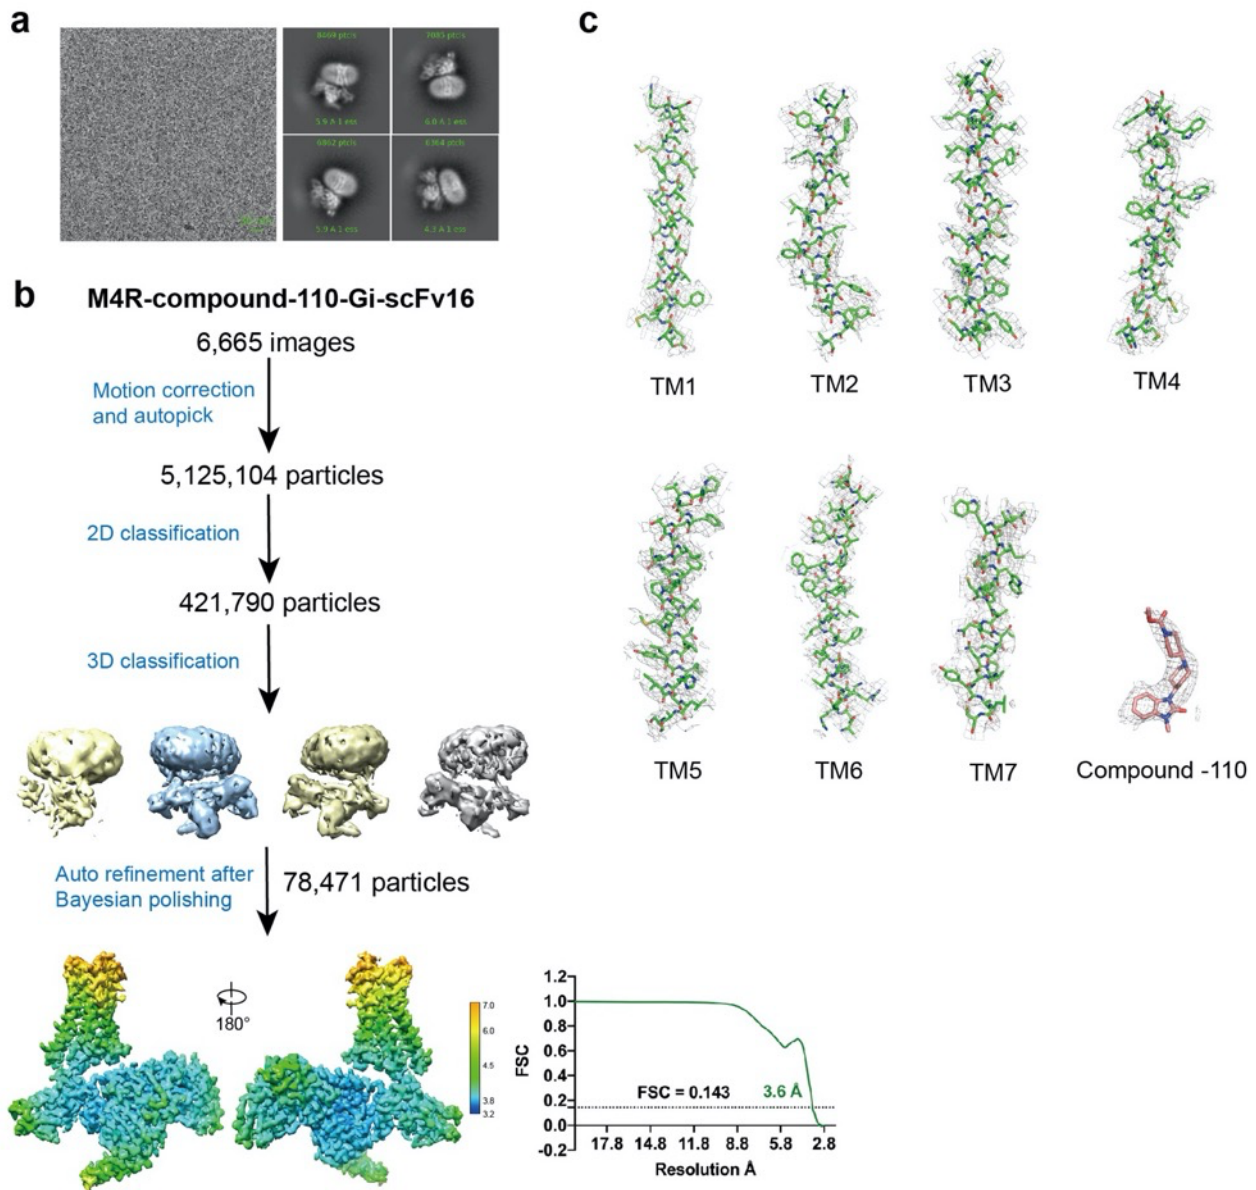

**Supplementary Figure 2. Flowchart of cryo-EM data analysis of the M4R-c110-G<sub>i</sub> complex.**

**a)** Representative cryo-EM image (from 6665 images) of the M4R-c110-G<sub>i</sub>-scFv16 complex (scale bar: 30 nm) and representative 2D classification showing distinct structural features of each component. **b)** M4R-c110-G<sub>i</sub> data processing and refinement (left) with ‘Gold-standard’ Fourier shell correlation curves (bottom inset) indicating resolution at FSC = 0.143 is 3.6 Å. **c)** Cryo-EM density maps and models of the M4R-c110-G<sub>i</sub> complex are shown for all transmembrane helices and compound-110.

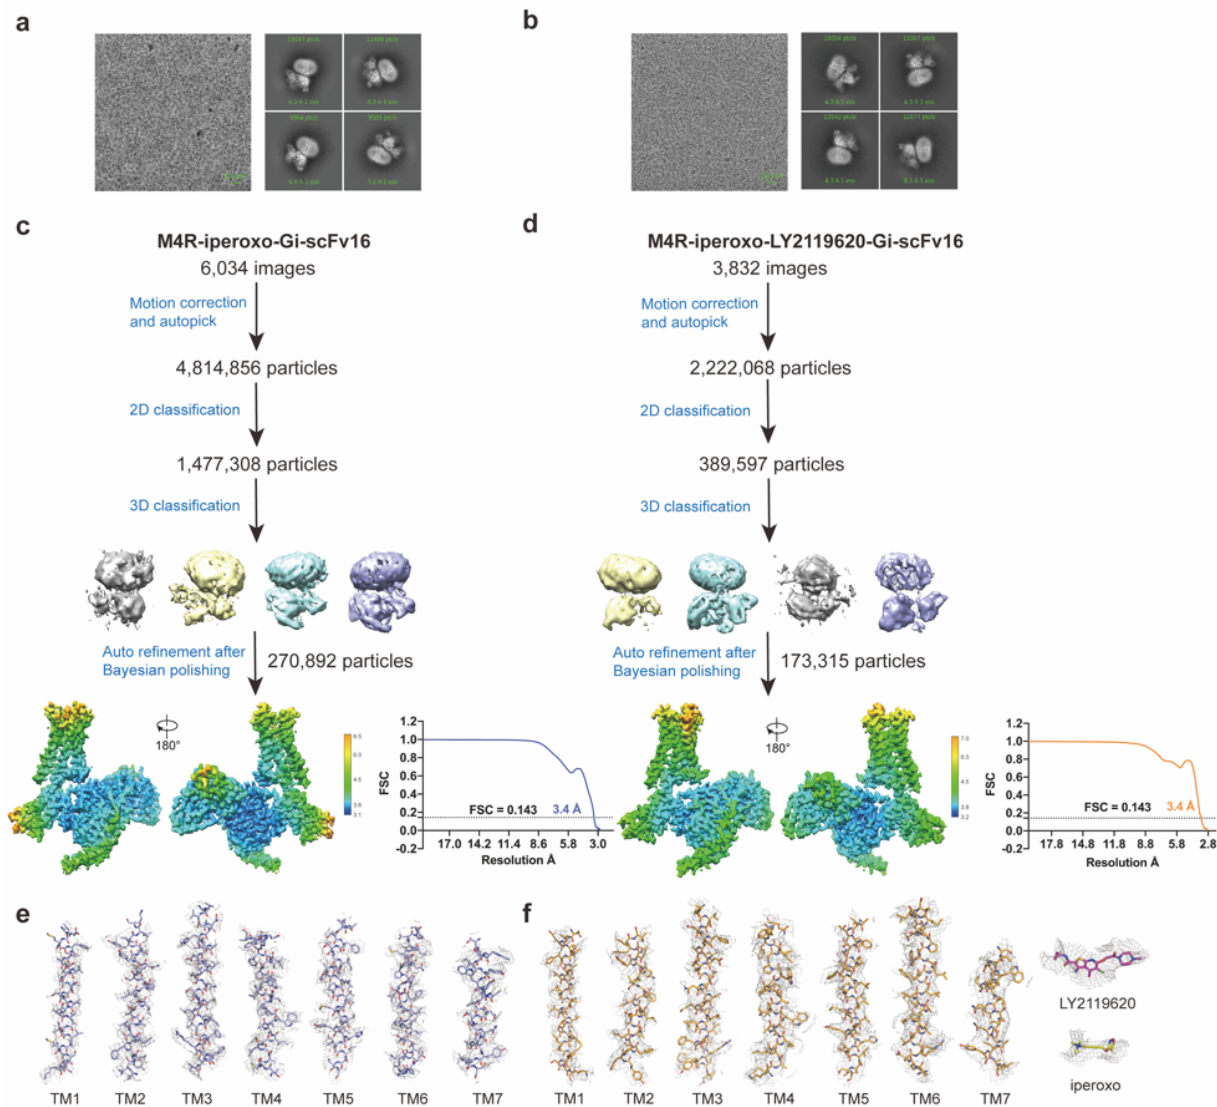

**Supplementary Figure 3. Flowchart of cryo-EM data analysis of M4R-ip-G<sub>i</sub> and M4R-ip-LY-G<sub>i</sub> complexes.** **a and b)** Representative cryo-EM images (scale bar: 30 nm) (from 6034 and 3832 images, respectively) and representative 2D classification showing distinct structural features of each component for the M4R-ip-G<sub>i</sub>-scFv16 (A) and M4R-ip-LY-G<sub>i</sub>-scFv16 (B) complexes. **c)** M4R-ip-G<sub>i</sub> data processing and refinement (left) with ‘Gold-standard’ Fourier shell correlation curves (bottom inset) indicating resolution at FSC = 0.143 is 3.4 Å. **d)** As in A for M4R-ip-LY-G<sub>i</sub> with resolution at FSC = 0.143 is 3.4 Å. **e and f)** Cryo-EM density maps and models of the M4R-ip-G<sub>i</sub> (e) and M4R-ip-LY-G<sub>i</sub> (f) complex, are shown for all transmembrane helices and ligands.

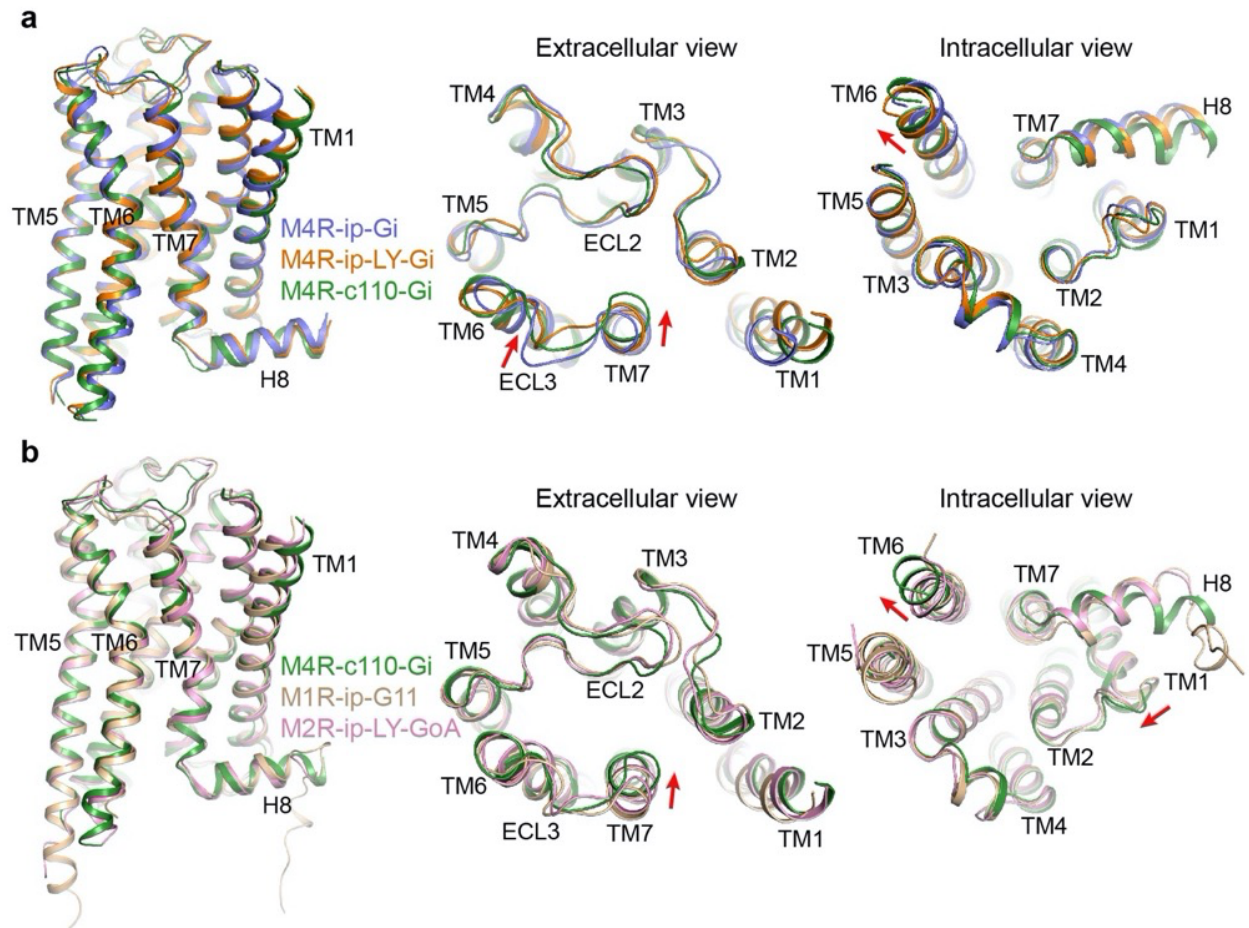

**Supplementary Figure 4. Structural comparison of active M4R, M1R and M2R structures.**

**a)** Overall comparison of the active states of M4R in the extracellular and intracellular views. **b)** The comparisons active M4R-c110-Gi with M1R and M2R active structures, and shown in the extracellular and intracellular views, separately.



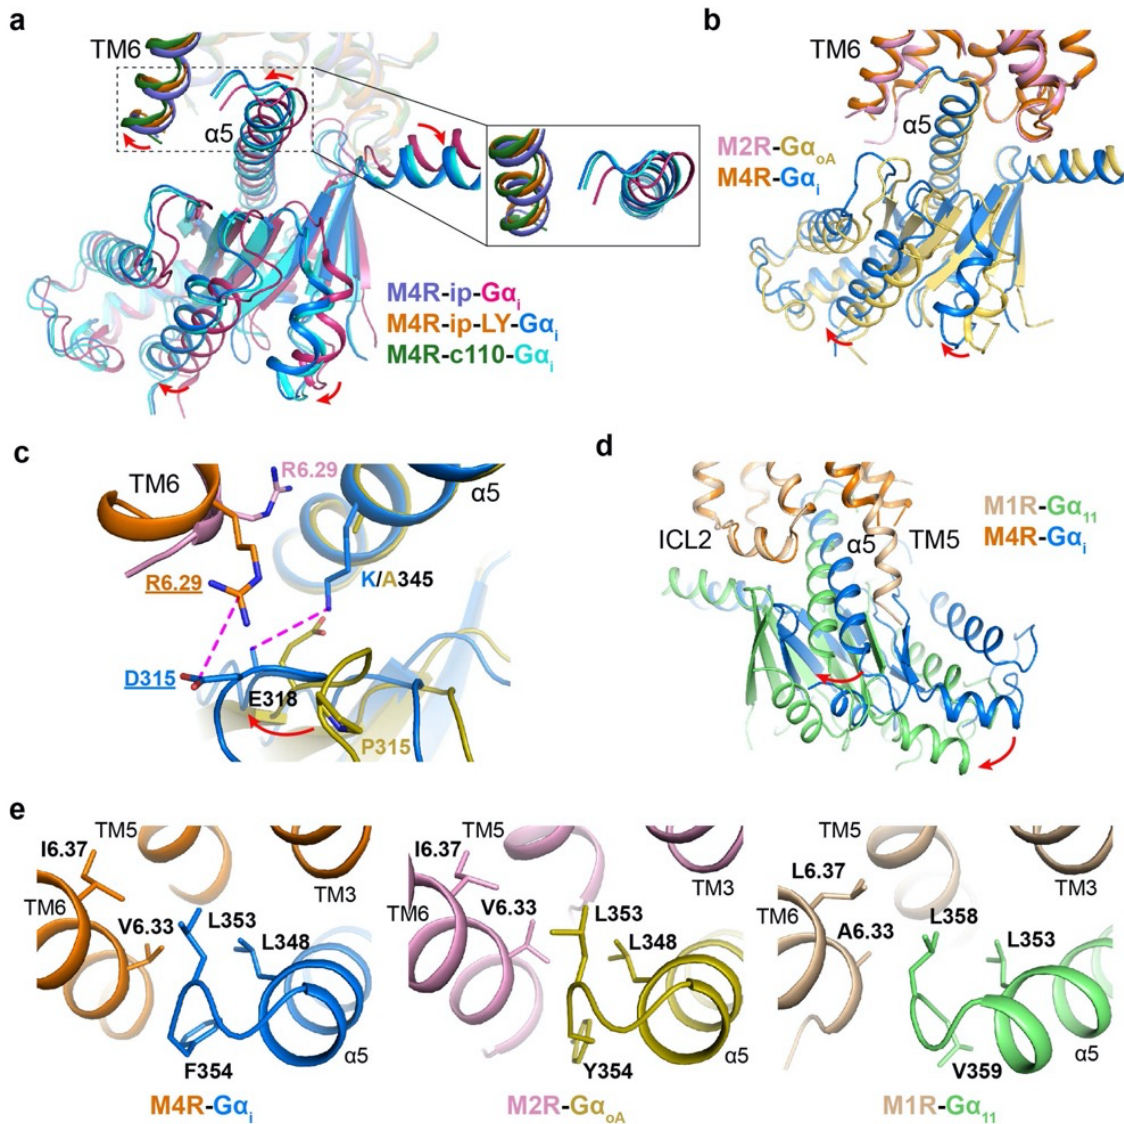

**Supplementary Figure 5. Comparison of the receptor-G protein binding interfaces in solved mAChR-G protein complexes.** a) Comparison of the receptor-G protein interface in M4R-ip-G $\alpha_i$ , M4R-ip-LY-G $\alpha_i$ , and M4R-c110-G $\alpha_i$  complex structures when the receptors are aligned. b) Comparison of the M4R-ip-LY-G $\alpha_i$  and M2R-G $\alpha_{oA}$  complex interfaces when the receptors are aligned. c) Interaction differences of the TM6-G $\alpha$  interface between M4R-ip-LY-G $\alpha_i$  and M2R-G $\alpha_{oA}$  structures. d) Comparison of the M4R-ip-LY-G $\alpha_i$  and M1R-G $\alpha_{11}$  complex interfaces when the receptors are aligned. e) Comparison of  $\alpha 5$ /TM6 interactions in M4R-ip-LY-G $\alpha_i$ , M2R-G $\alpha_{oA}$ , and M1R-G $\alpha_{11}$  complex structures.

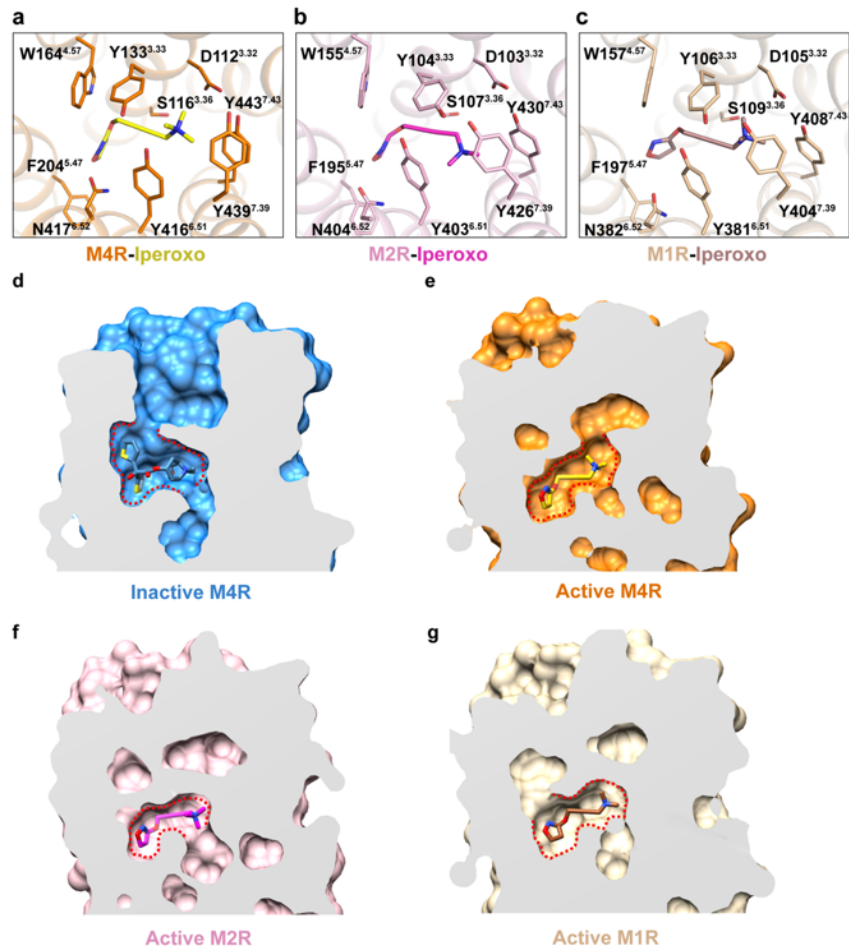

**Supplementary Figure 6. Comparison of iperoxo binding pockets in M4R, M2R, and M1R active structures. a, b and c) Sliced view of the iperoxo binding pockets in various receptor structures. d, e, f, and g) Key residues involved in iperoxo binding are shown as sticks.**

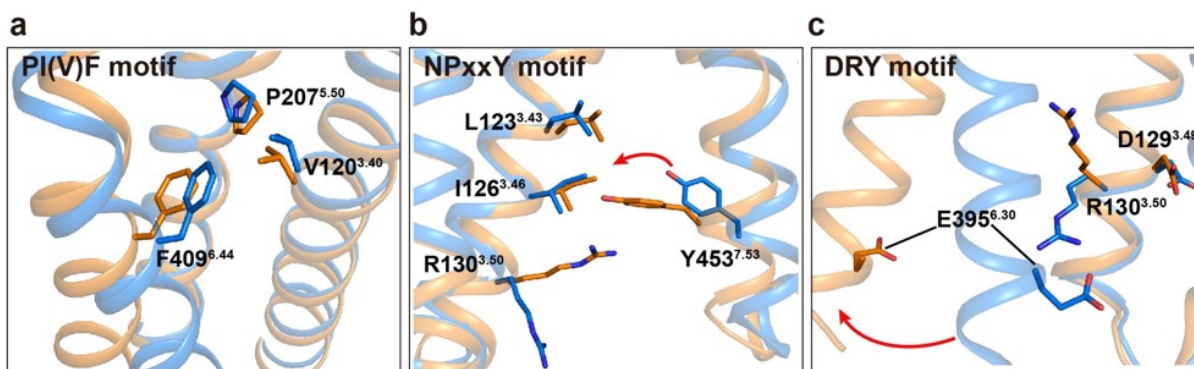

**Supplementary Figure 7. Comparison of activation motifs between inactive M4R (PDB code, 5DSG, blue) and active M4R-ip-LY-G<sub>i</sub> (orange) structures. a) PI(V) F motif, b) NPxxY motif and c) DRY motif. The red arrows indicate the conformational change from inactive- to active- states.**

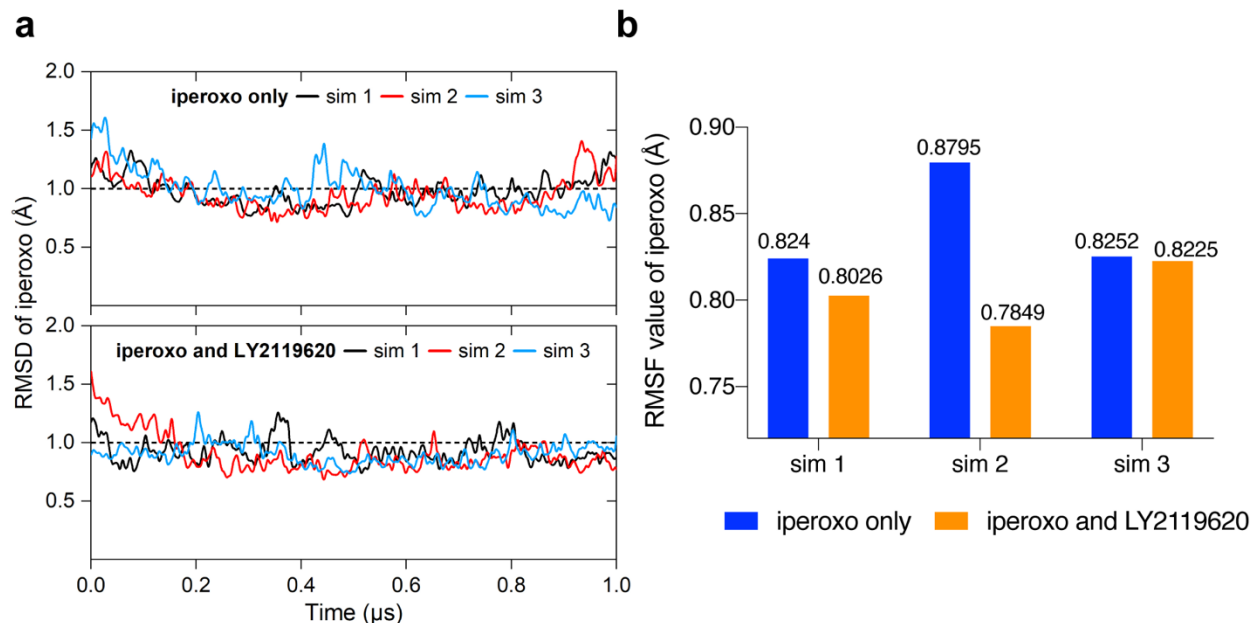

**Supplementary Figure 8. The cooperativity of iperoxo and LY2119620 in M4R in MD simulations.** Three independent MD simulation runs (1  $\mu$ s each) performed on M4R from M4-ip-Gi and M4-ip-LY-Gi complexes, separately. RMSD and RMSF values are calculated for each run. a) RMSD values of Iperoxo molecule in M4-ip (top) and M4-ip-LY (bottom) in three runs, sim1, sim2 and sim3. b) RMSF values of Iperoxo molecule in M4-ip (blue) and M4-ip-LY (orange) in three runs, sim1, sim2 and sim3. Source data are provided as a Source Data file.



**Supplementary Figure 9. The G protein and  $\beta$ -arrestin recruitments assays of iperoxol, ACh, compound-110 and LY2119620 in M4R and the cooperativity of compound-110 and LY2119620 with ACh in the BRET assays. Values are shown as the mean  $\pm$  SEM from  $n = 4$  independent biological replicates, each biological replicate has two technical replicates. Effects of the mutations of key residues on compound-110 induced cAMP accumulation. data are represented as mean  $\pm$  SEM from one independent assay with three technical replicates. Source data are provided as a Source Data file.**

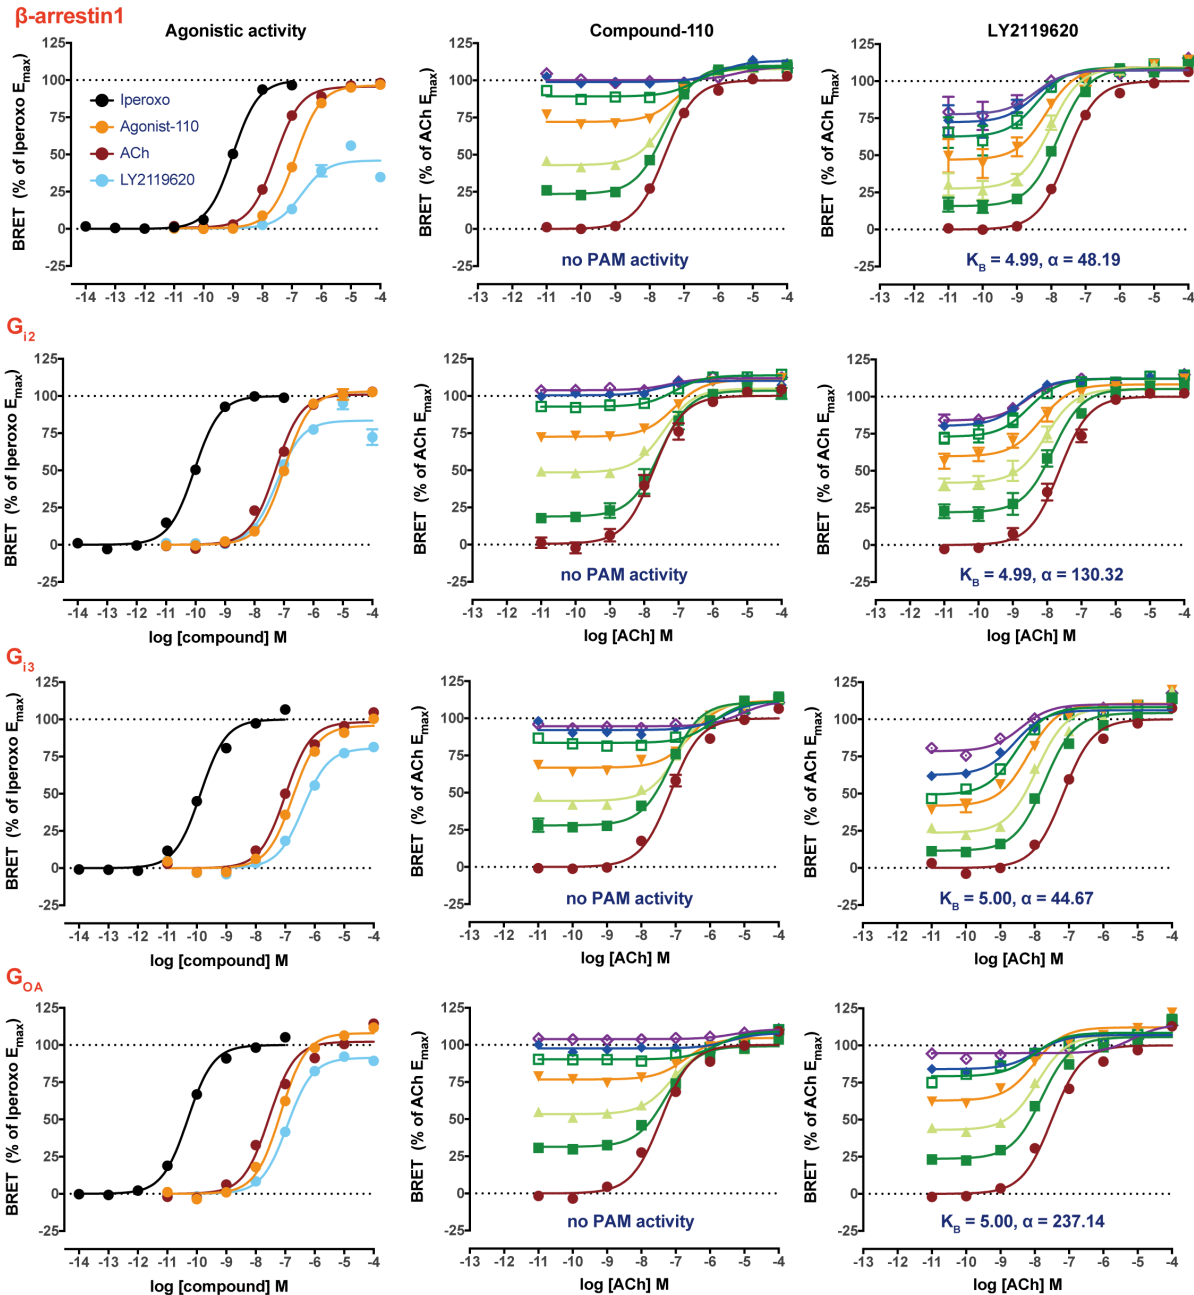

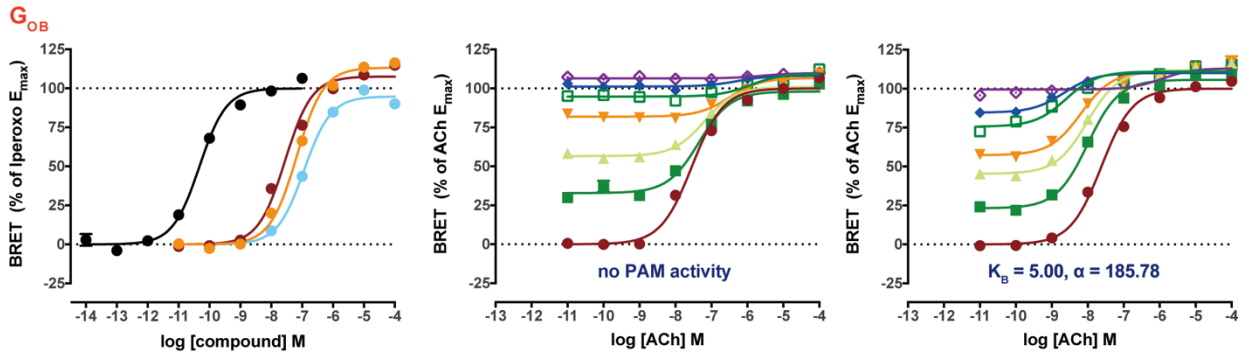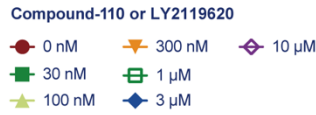

**cAMP assay**

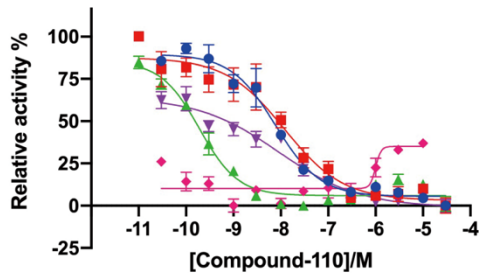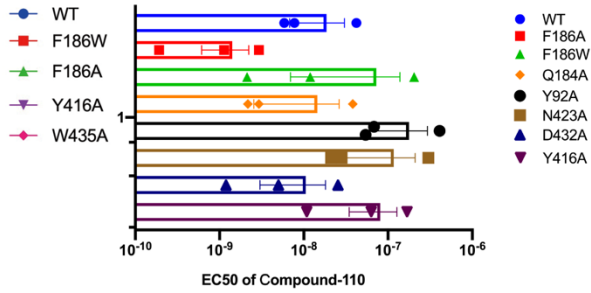

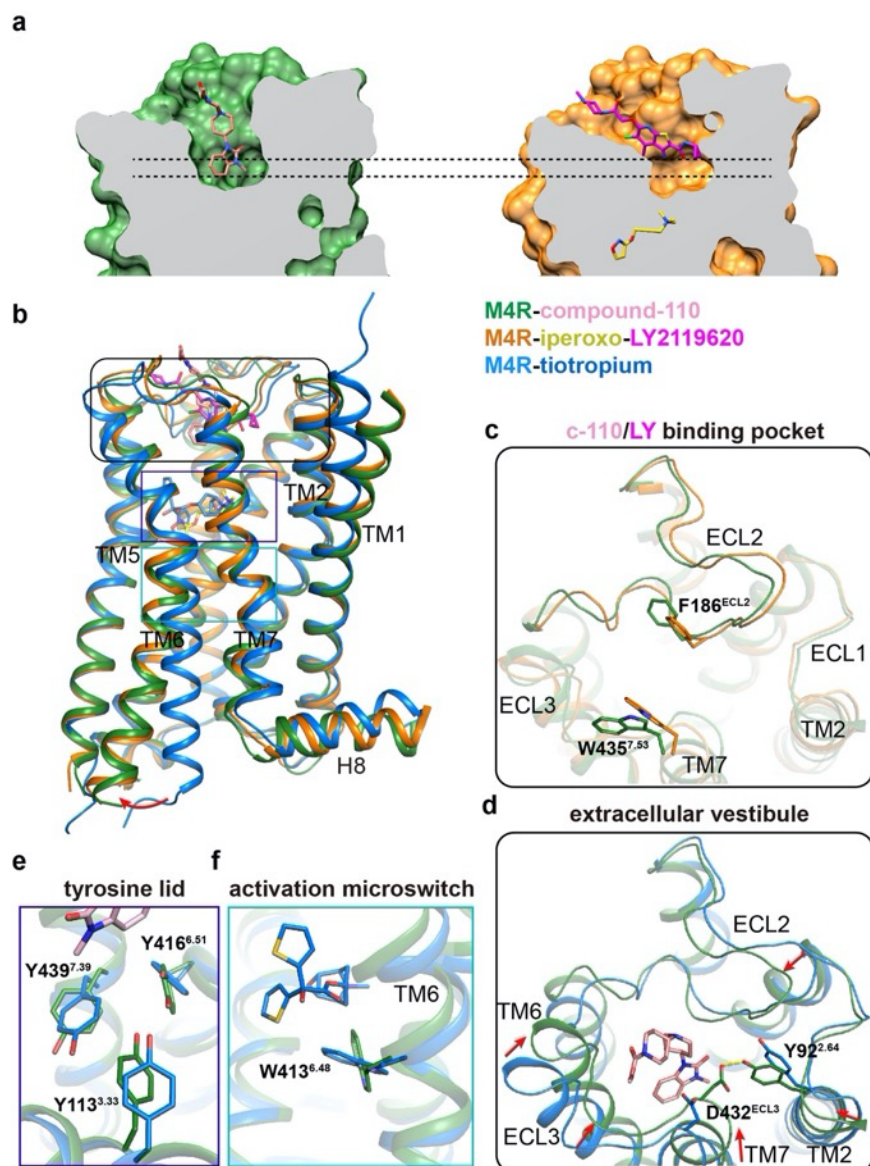

**Supplementary Figure 10. Comparison of active M4R-c110 and M4R-ip-LY structures with inactive M4R structure.** **a)** Surface cutaway side views comparing ligand binding positions of compound-110, LY2119620 and iperoxo in M4R structures. **b)** Comparison of inactive M4R (PDB code 5DSG, blue), M4R-c110-G<sub>i</sub> (green) and M4R-ip-LY (orange)-G<sub>i</sub> structures in sideview. **c)** Conformational change of the extracellular region between the M4R-c110-G<sub>i</sub> and M4R-ip-LY structures. **d)** Comparison of the extracellular vestibule in the M4R-c110-G<sub>i</sub> and inactive M4R structures. **e)** The relatively closed “tyrosine lid” in the M4R-c110-G<sub>i</sub> structure compared to that in the inactive structure. **f)** Rotation of the activation microswitch of Trp413<sup>6.48</sup> between inactive and active M4R structures.

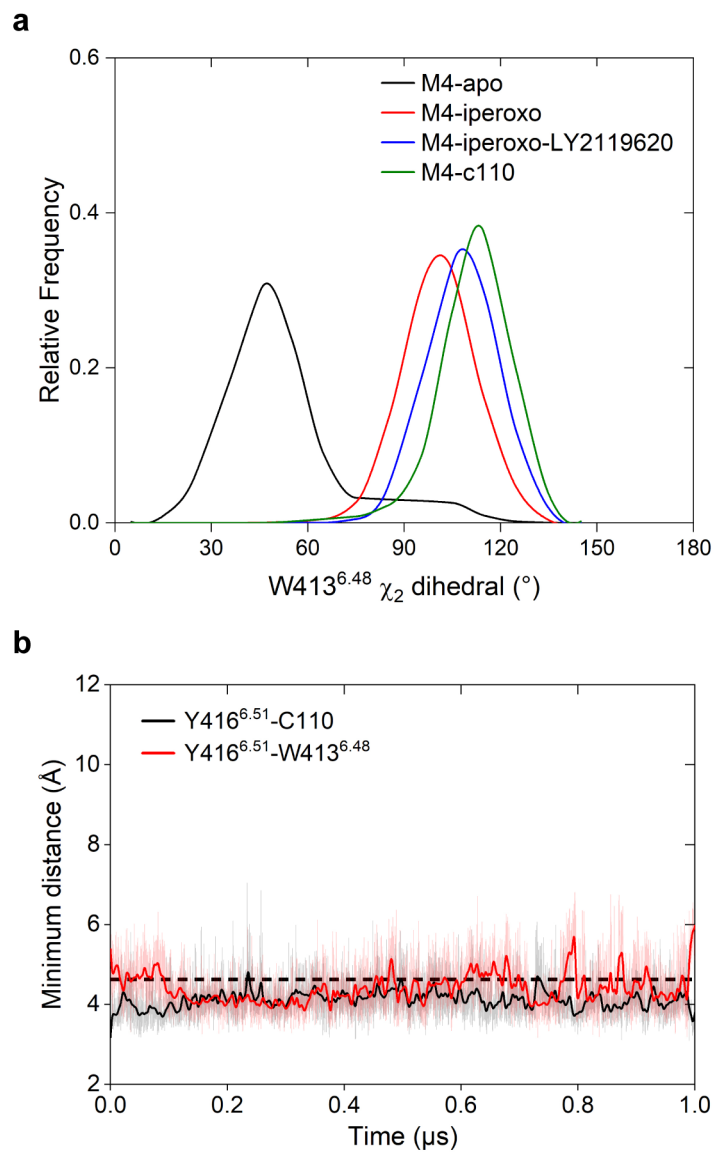

**Supplementary Figure 11. a)** Distribution of dihedral angle of the Trp413<sup>6.48</sup> side chain ( $\chi_2$ ) during the M4R MD simulations and **b)** distance between Tyr416<sup>6.51</sup> and Trp413<sup>6.48</sup> during the M4R-c110 MD simulations.

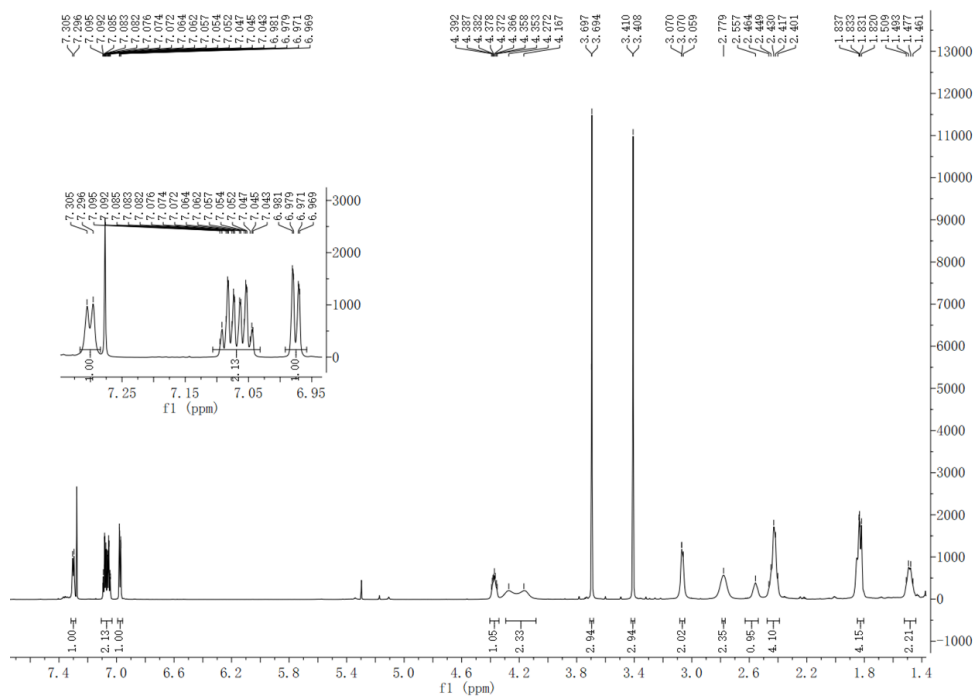

Supplementary Figure 12. <sup>1</sup>H-NMR spectra of compound-110



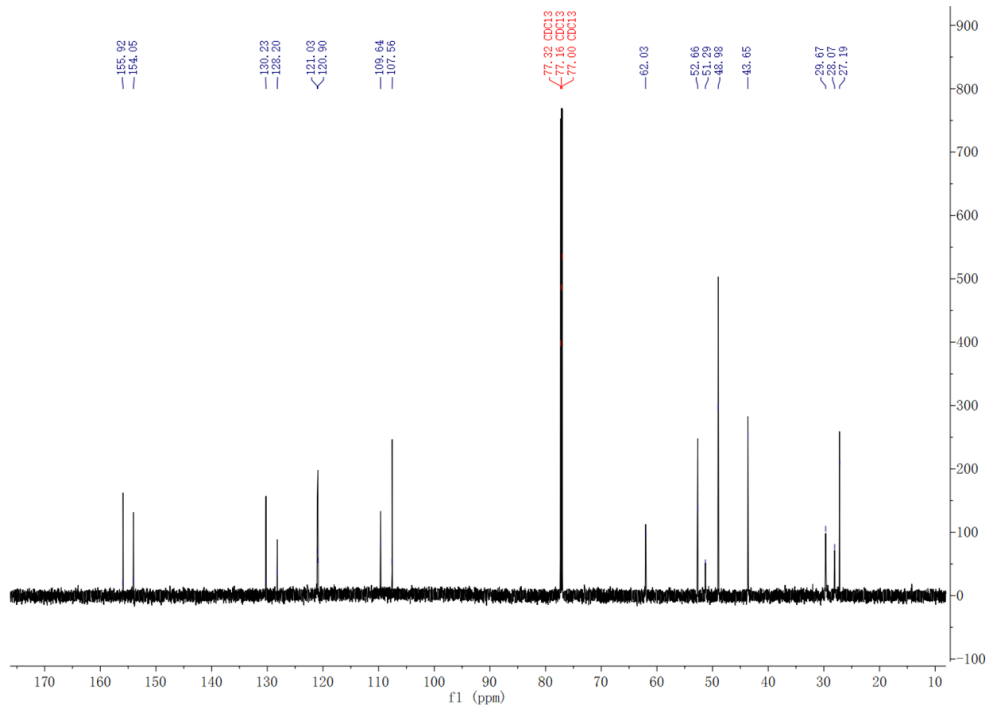

Supplementary Figure 13. <sup>13</sup>C-NMR spectra of compound-110

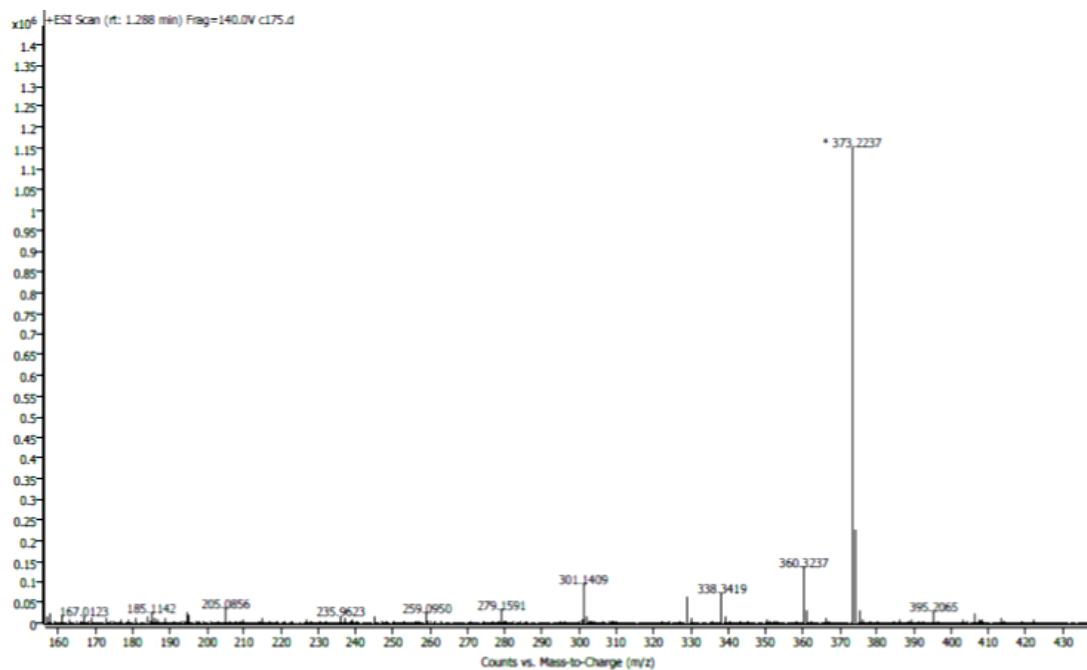

**Supplementary Figure 14. HRMS spectra of compound-110**

**Supplementary Table 1. Cryo-EM data collection, refinement and validation statistics.**

|                                           | #1 M4R-<br>compound110<br>-Gi-scFv16 | #2 M4R-iperoxo<br>-Gi-scFv16 | #3 M4R-ip-LY<br>-Gi-scFv16 |
|-------------------------------------------|--------------------------------------|------------------------------|----------------------------|
| <b>Data collection and processing</b>     |                                      |                              |                            |
| Magnification                             | 130,000                              | 130,000                      | 130,000                    |
| Voltage (kV)                              | 300                                  | 300                          | 300                        |
| Electron exposure (e-/Å <sup>2</sup> )    | 1.333                                | 1.333                        | 1.333                      |
| Defocus range (um)                        | -1.2~-2.0                            | -1.2~-2.0                    | -1.2~-2.0                  |
| Pixel size (Å)                            | 0.52                                 | 0.52                         | 0.52                       |
| Symmetry imposed                          | C1                                   | C1                           | C1                         |
| Final particle images (no.)               | 78,471                               | 270,892                      | 173,315                    |
| Map resolution (Å)                        | 3.6                                  | 3.4                          | 3.4                        |
| FSC threshold                             | 0.143                                | 0.143                        | 0.143                      |
| <b>Refinement</b>                         |                                      |                              |                            |
| Initial model used (PDB code)             | 5DSG                                 | 5DSG                         | 5DSG                       |
| Map sharpening B-factor (Å <sup>2</sup> ) | 58.4                                 | 64.2                         | 103.1                      |
| Model composition                         |                                      |                              |                            |
| Non-hydrogen atoms                        | 8584                                 | 8539                         | 8574                       |
| Protein residues                          | 1122                                 | 1122                         | 1122                       |
| <i>B</i> -factors (Å <sup>2</sup> )       |                                      |                              |                            |
| Protein                                   | 89.16                                | 114.62                       | 105.93                     |
| Ligand/Ion                                | 128.42                               | -                            | 123.55                     |
| RMSDs                                     |                                      |                              |                            |
| Bond lengths (Å)                          | 0.003                                | 0.003                        | 0.006                      |
| Bond angles (°)                           | 0.690                                | 0.660                        | 0.790                      |
| Validation                                |                                      |                              |                            |
| MolProbity score                          | 1.96                                 | 1.79                         | 1.93                       |
| Clash score                               | 14.04                                | 13.05                        | 16.35                      |
| Rotamer outliers (%)                      | 0.11                                 | 0.00                         | 0.00                       |
| Ramachandran Plot Statistics (%)          |                                      |                              |                            |
| Favored regions                           | 95.56                                | 97.10                        | 96.83                      |

|                    |      |      |      |
|--------------------|------|------|------|
| Allowed regions    | 4.44 | 2.90 | 3.17 |
| Disallowed regions | 0.00 | 0    | 0    |

---

**Supplementary Table 2. Effects of the mutations of key residues on compound-110, Ach, iperoxo and LY2119620.**  $E_{\max}$  and  $pEC_{50}$  were calculated from concentration-response curves of BRET assay. Data were normalized to the reference ligand iperoxo. ND, not detected. All data are the mean  $\pm$  SEM (n = 3 independent experiments).

|       | ACh             |                   |            | LY2119620       |                   |            |
|-------|-----------------|-------------------|------------|-----------------|-------------------|------------|
|       | $pEC_{50}$      | $\Delta pEC_{50}$ | $E_{\max}$ | $pEC_{50}$      | $\Delta pEC_{50}$ | $E_{\max}$ |
| WT    | 6.99 $\pm$ 0.06 | 0                 | 98 $\pm$ 2 | 6.21 $\pm$ 0.10 | 0                 | 57 $\pm$ 1 |
| D112E | 6.20 $\pm$ 0.01 | -0.79             | 87 $\pm$ 4 | ND              | ND                | ND         |
| F186A | 6.80 $\pm$ 0.08 | -0.19             | 95 $\pm$ 3 | 5.02 $\pm$ 0.02 | -1.19             | 76 $\pm$ 1 |
| R394A | 6.68 $\pm$ 0.07 | -0.31             | 94 $\pm$ 3 | 6.15 $\pm$ 0.12 | -0.06             | 51 $\pm$ 4 |
| Y416A | 5.50 $\pm$ 0.17 | -1.49             | 75 $\pm$ 7 | ND              | ND                | ND         |
| D432A | 7.14 $\pm$ 0.16 | 0.15              | 95 $\pm$ 1 | 6.49 $\pm$ 0.19 | 0.28              | 63 $\pm$ 3 |
| W435A | 5.91 $\pm$ 0.06 | -1.08             | 88 $\pm$ 1 | 5.10 $\pm$ 0.11 | -1.11             | 38 $\pm$ 1 |
| Y439A | 4.02 $\pm$ 0.43 | -2.97             | 74 $\pm$ 6 | 6.30 $\pm$ 0.38 | 0.09              | 3 $\pm$ 2  |

|       | Iperoxo         |                   | Compound-110    |                   |            |
|-------|-----------------|-------------------|-----------------|-------------------|------------|
|       | $pEC_{50}$      | $\Delta pEC_{50}$ | $pEC_{50}$      | $\Delta pEC_{50}$ | $E_{\max}$ |
| WT    | 9.89 $\pm$ 0.12 | 0                 | 6.87 $\pm$ 0.07 | 0                 | 98 $\pm$ 3 |
| D112E | 9.07 $\pm$ 0.03 | -0.82             | 5.84 $\pm$ 0.09 | -0.97             | 69 $\pm$ 7 |
| F186A | 9.68 $\pm$ 0.11 | -0.21             | 7.53 $\pm$ 0.07 | 0.66              | 95 $\pm$ 2 |
| R394A | 9.54 $\pm$ 0.06 | -0.35             | 6.37 $\pm$ 0.03 | -0.5              | 74 $\pm$ 3 |
| Y416A | 7.94 $\pm$ 0.28 | -1.95             | 6.59 $\pm$ 0.13 | -0.28             | 74 $\pm$ 4 |
| D432A | 9.93 $\pm$ 0.09 | 0.04              | 6.52 $\pm$ 0.06 | -0.35             | 87 $\pm$ 3 |
| W43A  | 8.88 $\pm$ 0.14 | -1.01             | 6.81 $\pm$ 0.11 | -0.06             | 69 $\pm$ 2 |
| Y439A | 6.74 $\pm$ 0.10 | -3.15             | 6.86 $\pm$ 0.12 | -0.01             | 38 $\pm$ 3 |
